1 **Reduction in antibiotic prescribing attainable with a gonococcal vaccine**

2

3 Stephen M. Kissler<sup>1\*</sup>, Moriah Mitchell<sup>2\*</sup>, Yonatan H. Grad<sup>1</sup>

4 (Full authorship and ordering TBD)

5

6 <sup>1</sup>Department of Immunology and Infectious Diseases, Harvard. T.H. Chan School of Public  
7 Health, Boston MA, USA

8 <sup>2</sup>Department of Epidemiology, Harvard. T.H. Chan School of Public Health, Boston MA, USA

9 \* contributed equally

10

11 Correspondence: Yonatan H. Grad ([ygrad@hsph.harvard.edu](mailto:ygrad@hsph.harvard.edu))

12

13 Key words: Gonorrhoea, vaccine, antibiotic prescribing, antibiotic resistance

It is made available under a [CC-BY-NC-ND 4.0 International license](#) .

## Antibiotic prescribing for gonorrhea

14 **Abstract.** A gonococcal vaccine could reduce antibiotic prescribing and associated resistance,  
15 but the potential gains have not been measured. We estimated the fraction of antibiotic prescrib-  
16 ing in the US attributable to gonorrhea. Gonorrhea contributes to an outsized proportion of antibi-  
17 otic prescriptions in young adults, males, and in the southern and western US. A gonococcal  
18 vaccine could substantially reduce antibiotic prescribing in these populations.

## Antibiotic prescribing for gonorrhea

### 19 **Introduction.**

20 Antibiotic resistance poses a growing threat to human health<sup>1</sup>. Antibiotic resistance is driven by  
21 the consumption of antibiotics, which exert evolutionary selective pressures on the intended target  
22 pathogen and on ‘bystander’ microorganisms<sup>2</sup>. Vaccination has been proposed as a means of  
23 reducing the incidence of illnesses that prompt antibiotic prescriptions, thereby reducing down-  
24 stream antibiotic resistance<sup>3</sup>.

25  
26 Gonorrhea is the second most prevalent reportable illness in the United States, with nearly  
27 600,000 cases reported in 2018<sup>4</sup>, and is a major contributor to morbidity worldwide<sup>5</sup>. The US  
28 treatment recommended by the Centers for Disease Control and Prevention (CDC) for gonorrhea  
29 is dual therapy with single dose oral azithromycin and intramuscular ceftriaxone<sup>6</sup>. Gonorrhea  
30 therefore contributes substantially to antibiotic prescribing.

31  
32 There is currently no vaccine licensed for the prevention gonorrhea, though modest vaccine-in-  
33 duced protection has been demonstrated via cross-protection from the MeNZB *Neisseria meningi-*  
34 *titidis* vaccine and the investigation of the benefit of meningococcal group B vaccine (Bexsero) is  
35 ongoing<sup>7,8</sup>. While the impact an effective gonococcal vaccine could be profound in terms of re-  
36 ductions in gonorrhea-associated morbidity, it also has the potential benefit of reducing a large  
37 amount of antibiotic prescribing. Such a vaccine might reduce the threat of multi-drug-resistant  
38 gonorrhea – a top public health threat according to the CDC<sup>1</sup> – as well as reduce the selective  
39 pressures exerted on other bystander organisms during the course of treatment for gonorrhea.  
40 However, the extent of impact of a gonococcal vaccine on antibiotic prescribing has not been  
41 quantified. Here, we integrate reported cases of gonorrhea in the United States with a large da-  
42 tabase capturing outpatient antibiotic prescriptions to estimate the amount of antibiotic prescribing  
43 attributable to gonorrhea and thus the reduction in antibiotic prescribing that would be possible  
44 with a gonococcal vaccine.

### 45 **Methods.**

#### 46 Study sample and population.

47  
48 We extracted annual cases of gonorrhea and chlamydia by state, sex, and age group (0–14, 15–  
49 19, 20–24, 25–29, 30–34, 35–39, 40–44, 45–54, 55–64, 65+) in the United States from 2015–  
50 2018, the most recent years available, from the CDC’s *AtlasPlus* portal<sup>9</sup>. We used the population  
51 sizes for each demographic and geographic group, available from the same source, to calculate  
52 cases per 1,000 individuals (**Table 1**).

53  
54 We extracted outpatient antibiotic prescriptions from the Truven MarketScan database<sup>10</sup> over the  
55 same timeframe. This database captures all outpatient pharmacy claims from a convenience sam-  
56 ple of 19.1–24.3 million individuals (5.9–7.6% of the US population), depending on the month. We  
57 linked each antibiotic prescription with the patient’s age, sex, state. Full extraction details are  
58 given in the **Supplement**.

59

It is made available under a [CC-BY-NC-ND 4.0 International license](https://creativecommons.org/licenses/by-nc-nd/4.0/) .

## Antibiotic prescribing for gonorrhea

60 Next, we estimated the number and proportion of azithromycin prescriptions, ceftriaxone prescrip-  
61 tions, and overall antibiotic prescriptions in the US that were attributable to gonorrhea in 2015-  
62 2018. The recommended course of azithromycin and ceftriaxone for treating gonorrhea is nor-  
63 mally administered under the supervision of a provider upon diagnosis, so these prescriptions are  
64 not recorded in the MarketScan outpatient prescriptions data. We therefore added one dose of  
65 azithromycin and one dose of ceftriaxone for each reported gonorrhea infection to the outpatient  
66 antibiotic prescriptions data extracted from MarketScan. We also accounted for antibiotic pre-  
67 scriptions for chlamydia, the most common reportable illness in the US, by adding one dose of  
68 azithromycin to the MarketScan outpatient prescriptions data for each reported chlamydia case.  
69 This is a conservative choice, since chlamydia may be treated by a single supervised dose of  
70 azithromycin (recommended) or a 7-day course of doxycycline. By assuming that all cases of  
71 chlamydia prompt an azithromycin dose, this will lead to an over-estimate of the number of azithro-  
72 mycin prescriptions that are actually given, yielding more conservative estimates of the relative  
73 impact of a gonococcal vaccine on azithromycin prescribing.

74  
75 For the years 2015–2018, we calculated the percent and total number of azithromycin prescrip-  
76 tions, ceftriaxone prescriptions, and total antibiotic prescriptions per 1,000 people that were at-  
77 tributable to gonorrhea. For 2018, when gonorrhea incidence was at its highest level in over a  
78 decade, we calculated the same statistics stratified by age, sex, and HHS region<sup>11</sup>.

79  
80 **Results.**

81 There were 1.79 reported cases of gonorrhea per 1,000 individuals in the United States in 2018.  
82 These accounted for 1.5% of all azithromycin prescriptions, 23.7% of all ceftriaxone prescriptions,  
83 and 0.53% of all antibiotic prescriptions of any type given in 2018 (**Table 1**). The incidence of  
84 gonorrhea has been rising steadily, increasing by a factor of 1.5 between 2015 and 2018. Mean-  
85 while, overall antibiotic prescribing rates have fallen, so that the proportion of antibiotic prescrip-  
86 tions due to gonorrhea has increased even faster than the increase in gonorrhea incidence alone  
87 would suggest. Reported gonorrhea cases are mainly concentrated in young adults. There were  
88 7.12 cases of gonorrhea reported per 1,000 individuals between the ages of 20 and 24 in 2018,  
89 accounting for 2.38% of all antibiotic prescriptions given in that age group. Reported gonorrhea  
90 cases were less frequent in females than in males (1.46 vs. 2.13 cases per 1,000 individuals in  
91 2018, respectively). Reported gonorrhea cases in 2018 were lowest in the northeast (1.07 cases  
92 per 1,000 people in HHS Region 1, Boston) and highest in the southeast (2.06 cases per 1,000  
93 people in HHS Region 4, Atlanta). However, gonorrhea-related antibiotic prescriptions accounted  
94 for the greatest share of overall antibiotic prescriptions in the west (0.72% of all antibiotic pre-  
95 scriptions in HHS Region 9, San Francisco) due to a relatively high rate of gonorrhea infections  
96 and a relatively low rate of antibiotic prescribing for other conditions. A vaccine could prevent  
97 some fraction of the antibiotic prescriptions associated with gonorrhea cases. Such a vaccine  
98 would likely have the greatest impact on antibiotic prescribing in young adults, in males, and in  
99 the southern and western US.

100  
101 **Discussion.**

It is made available under a [CC-BY-NC-ND 4.0 International license](https://creativecommons.org/licenses/by-nc-nd/4.0/) .

## Antibiotic prescribing for gonorrhea

102 We have estimated the share of antibiotic prescribing in the United States attributable to gonor-  
103 rhea infections and have identified the sub-populations in which antibiotic prescribing would likely  
104 decline the most with an effective gonococcal vaccine. Gonorrhea incidence and associated gon-  
105 orrhea-related antibiotic prescribing are especially variable between age groups, with the highest  
106 incidence and highest associated prescribing rates in young adults. Since overall antibiotic pre-  
107 scribing rates are lowest in this same age group, a gonococcal vaccine would yield an outsized  
108 benefit in this age group in terms of the fraction of antibiotic prescriptions averted. Reducing an-  
109 tibiotic prescribing in demographic groups that otherwise receive few antibiotics may be an espe-  
110 cially effective strategy for combatting antibiotic resistance, since a given antibiotic course is ex-  
111 pected to contribute more to resistance in an individual who receives few other prescriptions than  
112 in an individual who already receives many<sup>12</sup>. Taken together, these findings suggest that a gon-  
113 ococcal vaccine could lead to a substantial reduction in antibiotic prescribing, helping to combat  
114 the rise in antibiotic resistance.

115  
116 Our findings align with others that have documented higher rates of gonorrhea in the southern  
117 United States, in males, and in young adults<sup>4</sup>. Similarly, elevated rates of antibiotic prescribing in  
118 the southern United States and in children and older adults have been documented<sup>13</sup>. Gonorrhea  
119 incidence has been rising rapidly over the past decade along with rates of antibiotic resistance in  
120 gonorrhea. We anticipate that this trend will continue, making gonorrhea account for an even  
121 larger share of antibiotic prescriptions and increasing the potential benefit of a gonococcal vaccine  
122 for reducing both gonorrhea-related morbidity and associated antibiotic prescribing.

123  
124 The ultimate impact of a gonococcal vaccine will depend on the vaccine's efficacy and its uptake  
125 in the population. Prioritizing vaccination in young adults would likely have the greatest benefits  
126 for both reductions in morbidity and reductions in antibiotic prescribing. Potential reductions in  
127 antibiotic prescribing should be considered when assessing the cost-effectiveness of a gonococ-  
128 cal vaccine. While we have focused on vaccination, other measures to reduce gonorrhea inci-  
129 dence, such as increased condom use, should also lead to a downstream reduction in antibiotic  
130 prescribing. We have focused on gonorrhea incidence in the United States, but we anticipate that  
131 a gonococcal vaccine would similarly lead to substantial reductions in antibiotic prescribing world-  
132 wide.

It is made available under a [CC-BY-NC-ND 4.0 International license](https://creativecommons.org/licenses/by-nc-nd/4.0/).

Antibiotic prescribing for gonorrhea

|                          | Cases/1000 people |                       | Azithromycin   |                       | Ceftriaxone    |                       | Total antibiotics |                       |
|--------------------------|-------------------|-----------------------|----------------|-----------------------|----------------|-----------------------|-------------------|-----------------------|
|                          | Rx/1000 people    | Pct. due to gonorrhea | Rx/1000 people | Pct. due to gonorrhea | Rx/1000 people | Pct. due to gonorrhea | Rx/1000 people    | Pct. due to gonorrhea |
| <b>Year</b>              |                   |                       |                |                       |                |                       |                   |                       |
| 2015                     | 1.23              | 0.83                  | 148            | 6.3                   | 19.5           | 728                   | 0.34              |                       |
| 2016                     | 1.45              | 1.02                  | 142            | 6.7                   | 21.4           | 730                   | 0.40              |                       |
| 2017                     | 1.70              | 1.30                  | 131            | 7.3                   | 23.3           | 706                   | 0.48              |                       |
| 2018                     | 1.79              | 1.50                  | 119            | 7.6                   | 23.7           | 680                   | 0.53              |                       |
| <b>Age (2018)</b>        |                   |                       |                |                       |                |                       |                   |                       |
| 0-14                     | 0.05              | 0.06                  | 87             | 0.4                   | 11.4           | 762                   | 0.01              |                       |
| 15-19                    | 4.32              | 3.32                  | 130            | 25.9                  | 16.7           | 712                   | 1.21              |                       |
| 20-24                    | 7.12              | 5.21                  | 137            | 36.6                  | 19.4           | 598                   | 2.38              |                       |
| 25-29                    | 5.53              | 4.83                  | 115            | 20.2                  | 27.3           | 565                   | 1.96              |                       |
| 30-34                    | 3.66              | 3.06                  | 120            | 11.2                  | 32.7           | 621                   | 1.18              |                       |
| 35-39                    | 2.28              | 1.81                  | 126            | 6.3                   | 36.0           | 658                   | 0.69              |                       |
| 40-44                    | 1.37              | 1.09                  | 125            | 3.8                   | 36.5           | 653                   | 0.42              |                       |
| 45-54                    | 0.74              | 0.58                  | 127            | 1.9                   | 38.5           | 665                   | 0.22              |                       |
| 55-64                    | 0.29              | 0.21                  | 136            | 0.9                   | 30.5           | 739                   | 0.08              |                       |
| 65+                      | 0.05              | 0.03                  | 171            | 3.8                   | 1.2            | 797                   | 0.01              |                       |
| <b>Sex (2018)</b>        |                   |                       |                |                       |                |                       |                   |                       |
| F                        | 1.46              | 1.04                  | 140            | 8.8                   | 16.6           | 806                   | 0.36              |                       |
| M                        | 2.13              | 2.19                  | 97             | 6.3                   | 33.9           | 549                   | 0.78              |                       |
| <b>HHS Region (2018)</b> |                   |                       |                |                       |                |                       |                   |                       |
| 1 (Boston)               | 1.07              | 1.11                  | 96             | 6.1                   | 17.4           | 585                   | 0.37              |                       |
| 2 (New York City)        | 1.60              | 1.27                  | 126            | 7.4                   | 21.8           | 714                   | 0.45              |                       |
| 3 (Washington, D.C.)     | 1.46              | 1.31                  | 112            | 7.1                   | 20.7           | 677                   | 0.43              |                       |
| 4 (Atlanta)              | 2.06              | 1.48                  | 139            | 8.2                   | 25.1           | 769                   | 0.54              |                       |
| 5 (Chicago)              | 1.81              | 1.65                  | 109            | 7.5                   | 24.2           | 654                   | 0.55              |                       |
| 6 (Dallas)               | 1.92              | 1.32                  | 145            | 7.9                   | 24.4           | 779                   | 0.49              |                       |
| 7 (Kansas City)          | 1.98              | 1.93                  | 103            | 7.7                   | 25.8           | 635                   | 0.62              |                       |
| 8 (Denver)               | 1.37              | 1.58                  | 86             | 7.3                   | 18.7           | 553                   | 0.49              |                       |
| 9 (San Francisco)        | 1.96              | 1.89                  | 103            | 8.0                   | 24.5           | 546                   | 0.72              |                       |
| 10 (Seattle)             | 1.46              | 2.04                  | 72             | 7.0                   | 21.0           | 479                   | 0.61              |                       |

**Table 1. Gonorrhea cases and antibiotic prescribing rates per 1,000 people in the United States.**

Rx=prescriptions; pct=percent.

133  
134  
135  
136

It is made available under a [CC-BY-NC-ND 4.0 International license](#) .

## Antibiotic prescribing for gonorrhoea

137 **Funding.** The project was supported by funding from the Wellcome Trust.

138

139 **Conflicts of interest.** YHG has received consulting income from Quidel, Merck, and GSK, re-  
140 search support from Merck and Pfizer, and is on the scientific advisory board of Day Zero Diag-  
141 nostics.



## Antibiotic prescribing for gonorrhea

### References

- 142 1. Centers for Disease Control and Prevention. *Antibiotic Resistance Threats in the United*  
143 *States*. Atlanta, GA; 2019. doi:CS239559-B
- 144 2. Tedijanto C, Olesen SW, Grad YH, Lipsitch M. Estimating the proportion of bystander  
145 selection for antibiotic resistance among potentially pathogenic bacterial flora. *Proc Natl*  
146 *Acad Sci*. 2018;115(51):E11988-E11995. doi:10.1073/pnas.1810840115
- 147 3. Klugman KP, Black S. Impact of existing vaccines in reducing antibiotic resistance:  
148 Primary and secondary effects. *Proc Natl Acad Sci*. 2018;115(51):12896-12901.  
149 doi:10.1073/pnas.1721095115
- 150 4. Centers for Disease Control and Prevention. Gonorrhea. Sexually transmitted disease  
151 surveillance 2018. [https://www.cdc.gov/std/stats18/gonorrhea.htm#:~:text=Gonorrhea—](https://www.cdc.gov/std/stats18/gonorrhea.htm#:~:text=Gonorrhea—United States,the historic low in 2009. Published 2020. Accessed December 7, 2020.)  
152 *United States,the historic low in 2009*. Published 2020. Accessed December 7, 2020.
- 153 5. Rowley J, Vander Hoorn S, Korenromp E, et al. Chlamydia, gonorrhoea, trichomoniasis  
154 and syphilis: global prevalence and incidence estimates, 2016. *Bull World Health Organ*.  
155 2019;97(8):548-562P. doi:10.2471/BLT.18.228486
- 156 6. Centers for Disease Control and Prevention. Gonococcal Infections. 2015 STD Treatment  
157 Guidelines. <https://www.cdc.gov/std/tg2015/gonorrhea.htm>. Published 2020. Accessed  
158 December 7, 2020.
- 159 7. Unemo M, Sikora AE. Proof of principle for effectiveness of a gonorrhoea vaccine. *Nat*  
160 *Rev Urol*. 2017;14(11):643-644. doi:10.1038/nrurol.2017.139
- 161 8. National Institute of Allergy and Infectious Diseases (NIAID). *Safety and Efficacy Study of*  
162 *Meningococcal Group B Vaccine RMenB+OMV NZ (Bexsero) to Prevent Gonococcal*  
163 *Infection.*; 2020.
- 164 9. Centers for Disease Control and Prevention. NCHHSTP AtlasPlus.  
165 <https://www.cdc.gov/nchhstp/atlas/>. Published 2020. Accessed December 7, 2020.
- 166 10. IBM Watson Health. *IBM MarketScan Research Databases for Life Sciences*  
167 *Researchers*. Somers, NY, USA; 2019.
- 168 11. U.S. Department of Health and Human Services. Regional Offices.  
169 <https://www.hhs.gov/about/agencies/iea/regional-offices/index.html>. Published 2017.
- 170 12. Olesen SW, Barnett ML, MacFadden DR, et al. The distribution of antibiotic use and its  
171 association with antibiotic resistance. *Elife*. 2018;7. doi:10.7554/eLife.39435
- 172 13. Sanchez G V., Fleming-Dutra KE, Roberts RM, Hicks LA. Core Elements of Outpatient  
173 Antibiotic Stewardship. *MMWR Recomm Reports*. 2016;65(6):1-12.  
174 doi:10.15585/mmwr.rr6506a1  
175  
176



## Antibiotic prescribing for gonorrhea

### 177 **Supplement.**

178

179 Extracting antibiotic claims from the MarketScan database. To extract antibiotic prescribing rates  
180 from the MarketScan database, we began by extracting the age, sex, state of enrollment, and  
181 member identification number for every person with a full month of insurance enrollment for each  
182 month between January 2015 and December 2018. **Supplemental Table 1** lists the number of  
183 members enrolled in each month and the proportion of the US population represented. For each  
184 member in each month, we then extracted all associated antibiotic claims. Antibiotics were iden-  
185 tified by the National Drug Code (NDC) number using a lookup file containing the therapeutic  
186 class and drug name provided by Truven MarketScan. To estimate the annual *per capita* antibiotic  
187 prescribing rate, we divided the total number of antibiotics prescribed in a given year by the total  
188 number of member-months in that year (*i.e.*, the sum of the number of members enrolled across  
189 all months in that year) and multiplied by 12. Multiplying this quantity by 1,000 yielded the number  
190 of antibiotic prescriptions per 1,000 people in that year. We performed these extractions for  
191 azithromycin prescriptions, ceftriaxone prescriptions, and all antibiotic prescriptions.

It is made available under a [CC-BY-NC-ND 4.0 International license](https://creativecommons.org/licenses/by-nc-nd/4.0/) .

Antibiotic prescribing for gonorrhea

| Year | Month | Members (millions) | Percent of US population |
|------|-------|--------------------|--------------------------|
| 2015 | 1     | 24.3               | 7.61                     |
|      | 2     | 24.3               | 7.60                     |
|      | 3     | 24.3               | 7.58                     |
|      | 4     | 24.2               | 7.56                     |
|      | 5     | 24.1               | 7.54                     |
|      | 6     | 24.1               | 7.51                     |
|      | 7     | 24.0               | 7.50                     |
|      | 8     | 24.0               | 7.46                     |
|      | 9     | 23.9               | 7.45                     |
|      | 10    | 23.9               | 7.44                     |
|      | 11    | 23.8               | 7.42                     |
|      | 12    | 23.8               | 7.39                     |
| 2016 | 1     | 24.1               | 7.49                     |
|      | 2     | 24.1               | 7.49                     |
|      | 3     | 24.1               | 7.48                     |
|      | 4     | 24.1               | 7.47                     |
|      | 5     | 23.9               | 7.42                     |
|      | 6     | 24.0               | 7.42                     |
|      | 7     | 23.9               | 7.41                     |
|      | 8     | 23.9               | 7.38                     |
|      | 9     | 23.8               | 7.36                     |
|      | 10    | 23.7               | 7.33                     |
|      | 11    | 23.6               | 7.30                     |
|      | 12    | 23.5               | 7.27                     |
| 2017 | 1     | 19.8               | 6.12                     |
|      | 2     | 19.8               | 6.11                     |
|      | 3     | 19.8               | 6.10                     |
|      | 4     | 19.7               | 6.08                     |
|      | 5     | 19.7               | 6.06                     |
|      | 6     | 19.6               | 6.05                     |
|      | 7     | 19.6               | 6.02                     |
|      | 8     | 19.5               | 6.01                     |
|      | 9     | 19.5               | 5.99                     |
|      | 10    | 19.5               | 5.98                     |
|      | 11    | 19.2               | 5.91                     |
|      | 12    | 19.2               | 5.89                     |
| 2018 | 1     | 21.1               | 6.48                     |
|      | 2     | 21.1               | 6.48                     |
|      | 3     | 21.1               | 6.46                     |
|      | 4     | 21.0               | 6.45                     |
|      | 5     | 21.0               | 6.43                     |
|      | 6     | 20.9               | 6.41                     |
|      | 7     | 20.9               | 6.39                     |
|      | 8     | 20.9               | 6.38                     |
|      | 9     | 20.8               | 6.37                     |
|      | 10    | 20.7               | 6.34                     |
|      | 11    | 20.7               | 6.33                     |
|      | 12    | 20.6               | 6.30                     |

192  
193  
194  
195  
196

**Supplemental Table 1. Number of Insurance members represented in the MarketScan database.** The percent of the US population represented in the MarketScan data is calculated using the monthly resident population of the United States as reported by the United States Census Bureau (<https://www.census.gov/data/tables/time-series/demo/popest/2010s-national-total.html>)
